# Supplementary material
Source: PubMed Central journal article supplement (PMC2825087)

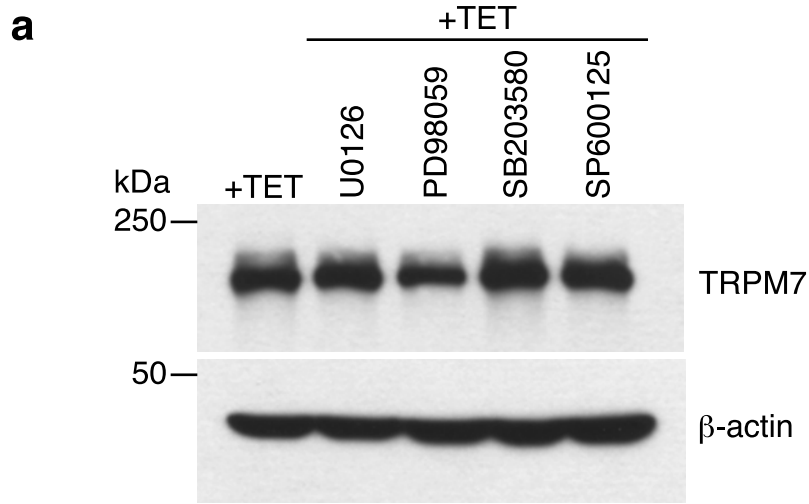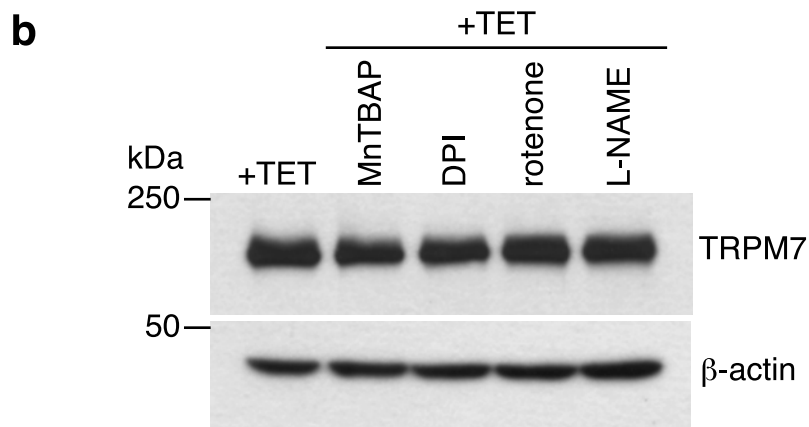

Supplement: NIHMS170951-supplement-01.pdf [file NIHMS170951-supplement-01.pdf]

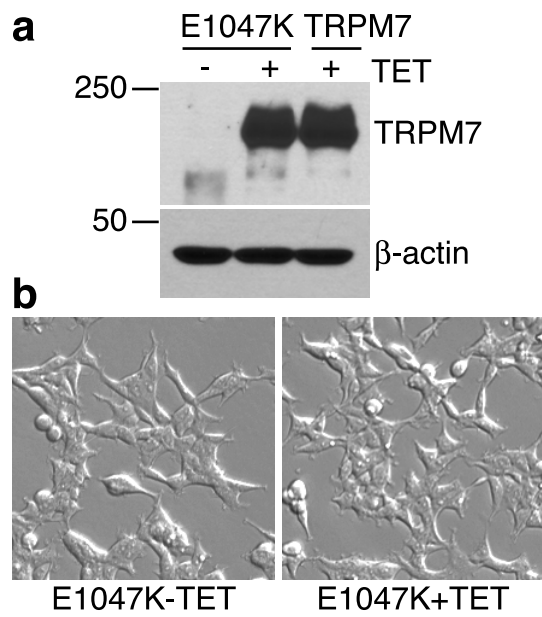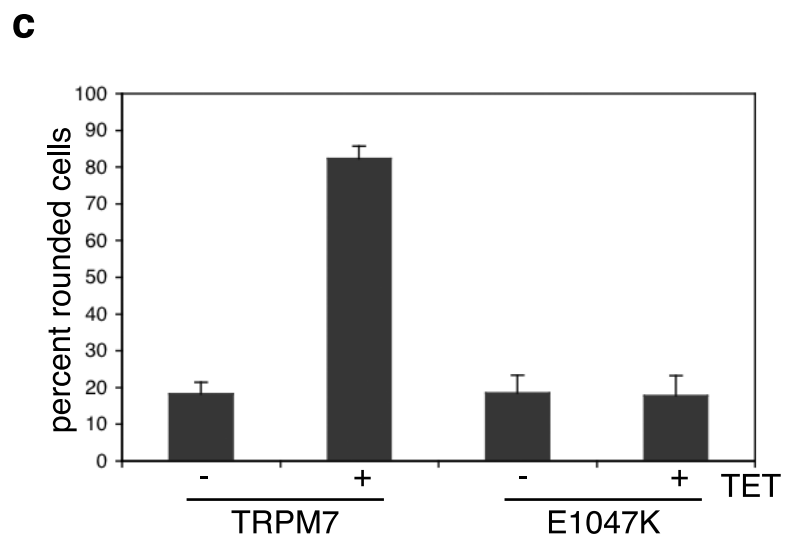

Supplementary Figure 2

Supplement: NIHMS170951-supplement-02.pdf [file NIHMS170951-supplement-02.pdf]

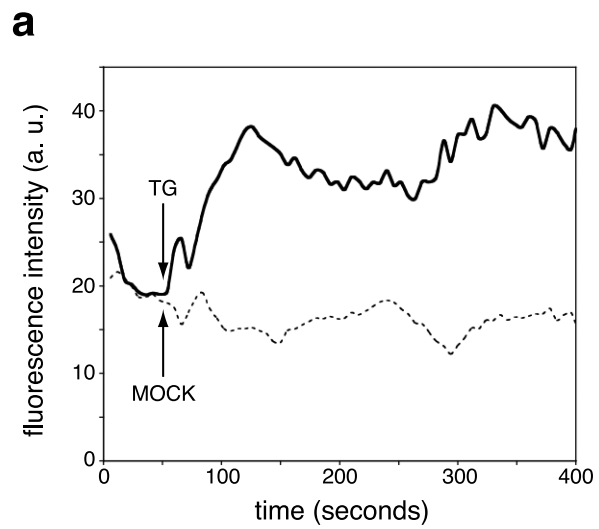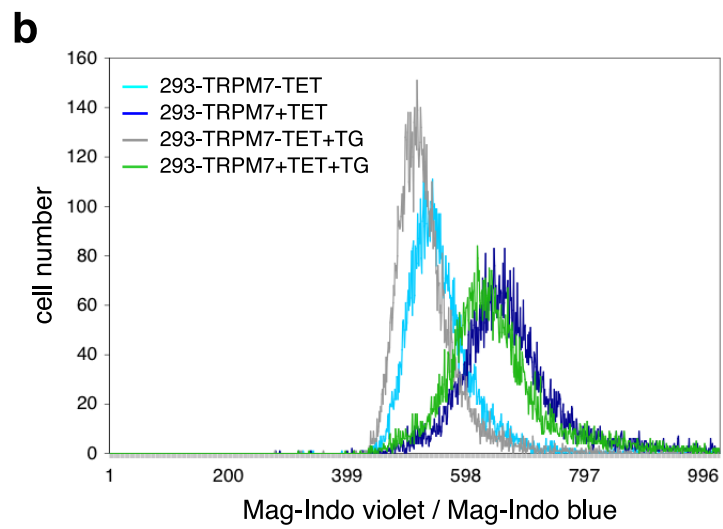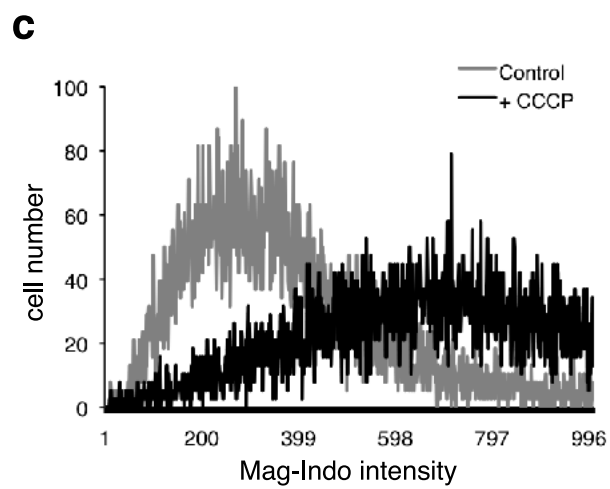

Supplementary Figure 3

Supplement: NIHMS170951-supplement-03.pdf [file NIHMS170951-supplement-03.pdf]

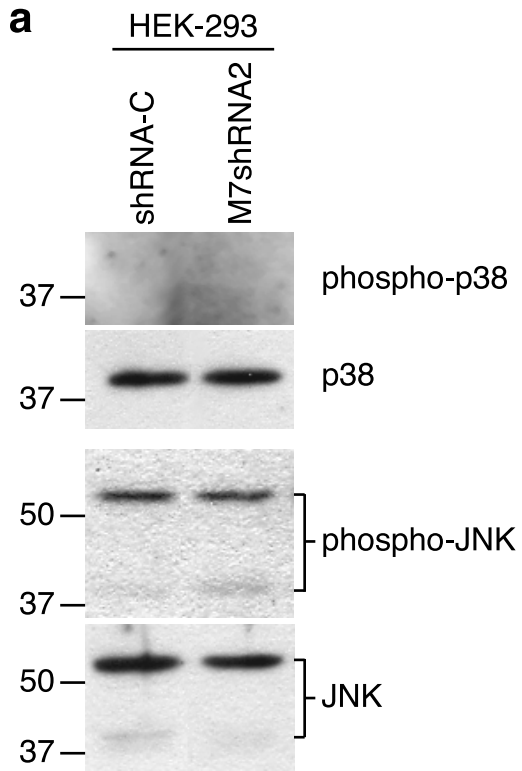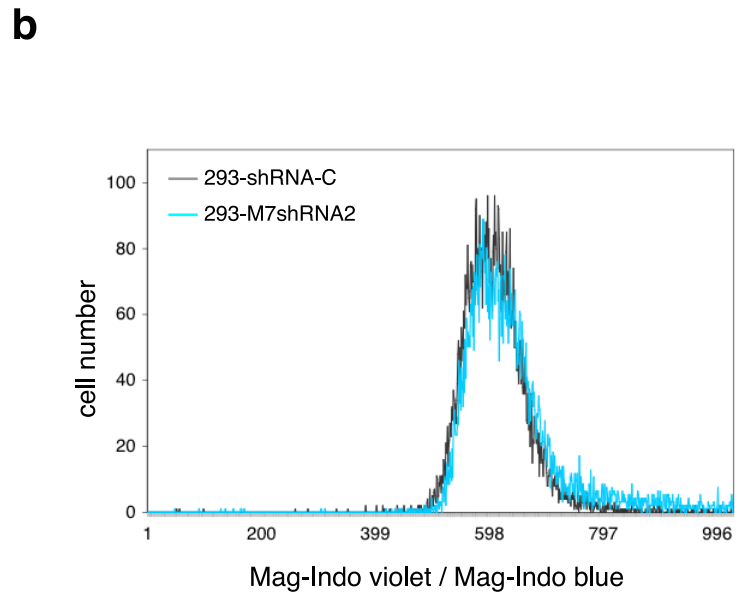

Supplementary Figure 4

Supplement: NIHMS170951-supplement-04.pdf [file NIHMS170951-supplement-04.pdf]

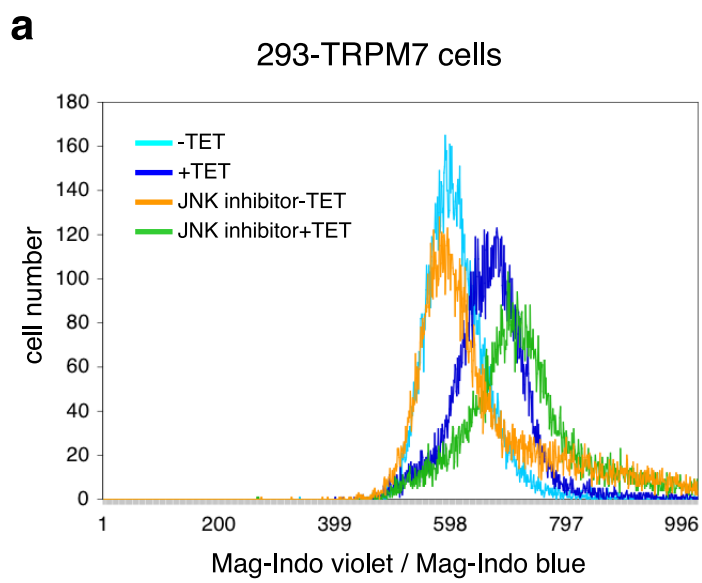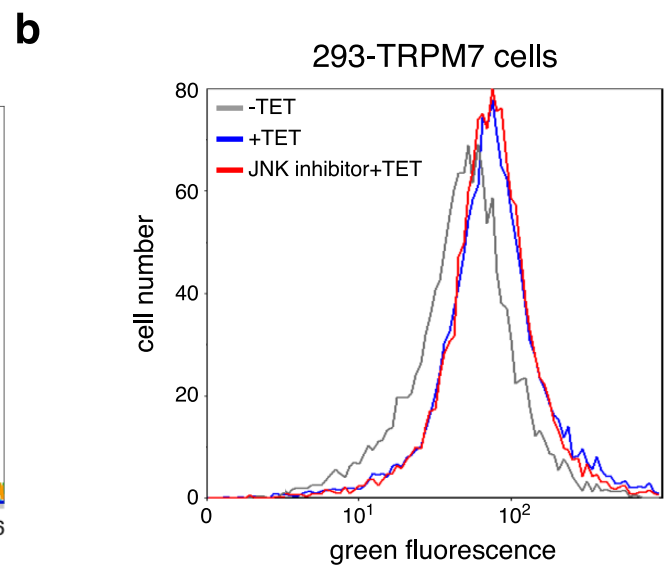

Supplement: NIHMS170951-supplement-05.pdf [file NIHMS170951-supplement-05.pdf]
